# Supplementary material
Source: PubMed Central journal article supplement (PMC5018569)
Supplement: jcbn15-148sf01.pdf [file jcbn15-148sf01.pdf]

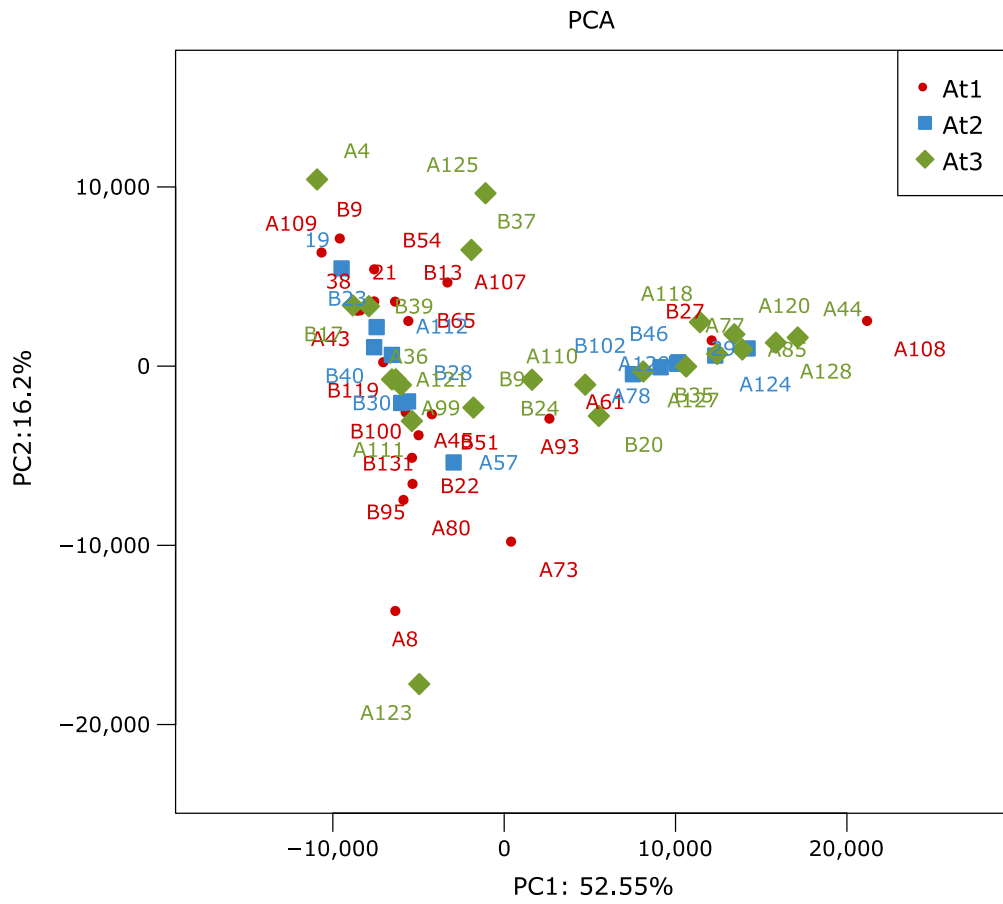

**Supplemental Fig. 1.** PCA of different antibiotic duration. Red circles represent children with PD and antibiotic durations of less than 3 days; blue squares represent children with PD and antibiotic durations of 3 to 7 days; and green squares represent children with PD and antibiotic durations of more than 7 days.
