# Supplementary material
Source: PubMed Central journal article supplement (PMC5018569)
Supplement: jcbn15-148st01.pdf [file jcbn15-148st01.pdf]

Supplemental Table 1. Detailed community features of each sample

| Group | Sample ID | Reads  | 0.97 |                   |                   |                     |                           |
|-------|-----------|--------|------|-------------------|-------------------|---------------------|---------------------------|
|       |           |        | OTU  | Ace               | Chao              | Shannon             | Simpson                   |
| VAD   | A107      | 10,911 | 37   | 45<br>(39-65)     | 42<br>(38-60)     | 1.47<br>(1.46-1.48) | 0.305<br>(0.3008-0.3092)  |
| VAD   | A108      | 10,911 | 48   | 59<br>(52-79)     | 57<br>(50-84)     | 0.14<br>(0.13-0.15) | 0.9645<br>(0.9615-0.9675) |
| VAD   | A109      | 10,911 | 24   | 54<br>(37-92)     | 42<br>(-28-105)   | 1.2<br>(1.19-1.21)  | 0.3951<br>(0.3903-0.3999) |
| VAD   | A110      | 10,911 | 79   | 88<br>(-82-103)   | 85<br>(-81-101)   | 0.98<br>(0.95-1.02) | 0.6856<br>(0.6748-0.6963) |
| VAD   | A111      | 10,911 | 63   | 78<br>(-68-104)   | 74<br>(-66-103)   | 1.93<br>(1.91-1.95) | 0.228<br>(0.224-0.2321)   |
| VAD   | A112      | 10,911 | 37   | 51<br>(41-81)     | 46<br>(39-74)     | 1.64<br>(1.62-1.66) | 0.2851<br>(0.2786-0.2917) |
| VAD   | A118      | 10,911 | 35   | 84<br>(-61-126)   | 51<br>(39-93)     | 0.98<br>(0.97-1)    | 0.5323<br>(0.5258-0.5389) |
| VAD   | A120      | 10,911 | 72   | 97<br>(-83-131)   | 98<br>(-81-145)   | 0.98<br>(0.96-1)    | 0.6372<br>(0.6297-0.6448) |
| VAD   | A121      | 10,911 | 47   | 73<br>(-60-101)   | 55<br>(49-78)     | 1.64<br>(1.62-1.66) | 0.3075<br>(0.3013-0.3136) |
| VAD   | A123      | 10,911 | 50   | 88<br>(-70-121)   | 81<br>(-59-149)   | 0.53<br>(0.51-0.54) | 0.785<br>(0.7785-0.7914)  |
| VAD   | A124      | 10,911 | 91   | 159<br>(-133-202) | 143<br>(-111-222) | 0.57<br>(0.55-0.59) | 0.829<br>(0.8219-0.836)   |
| VAD   | A125      | 10,911 | 47   | 71-164            | 71<br>(-55-122)   | 0.78<br>(0.77-0.79) | 0.51<br>(0.5069-0.5131)   |
| VAD   | A127      | 10,911 | 24   | 55<br>(38-93)     | 42<br>(28-99)     | 0.32<br>(0.3-0.34)  | 0.8834<br>(0.8764-0.8904) |
| VAD   | A128      | 10,911 | 42   | 156<br>(-115-221) | 78<br>(-55-145)   | 0.37<br>(0.36-0.39) | 0.8162<br>(0.8102-0.8223) |
| VAD   | A129      | 10,911 | 34   | 52<br>(40-86)     | 47<br>(38-80)     | 0.1<br>(0.09-0.12)  | 0.9737<br>(0.9702-0.9771) |
| VAD   | A36       | 10,911 | 52   | 70<br>(60-94)     | 63<br>(55-96)     | 2.2<br>(2.19-2.22)  | 0.1516<br>(0.1498-0.1535) |
| VAD   | A4        | 10,911 | 19   | 37<br>(26-64)     | 26<br>(20-56)     | 0.17<br>(0.16-0.18) | 0.9431<br>(0.9386-0.9477) |
| VAD   | A43       | 10,911 | 29   | 42<br>(32-82)     | 38<br>(31-69)     | 1.35<br>(1.34-1.37) | 0.3436<br>(0.3398-0.3475) |
| VAD   | A44       | 10,911 | 52   | 65<br>(57-87)     | 61<br>(55-84)     | 0.42<br>(0.41-0.44) | 0.8372<br>(0.8313-0.8432) |
| VAD   | A45       | 10,911 | 41   | 62<br>(50-89)     | 52<br>(44-89)     | 1.9<br>(1.88-1.92)  | 0.1913<br>(0.1883-0.1943) |
| VAD   | A57       | 10,911 | 47   | 74<br>(-60-102)   | 70<br>(-53-129)   | 1.68<br>(1.67-1.69) | 0.2321<br>(0.2297-0.2345) |
| VAD   | A61       | 10,911 | 38   | 51<br>(42-76)     | 49<br>(41-80)     | 0.82<br>(0.81-0.84) | 0.5963<br>(0.5883-0.6043) |
| VAD   | A73       | 10,911 | 56   | 62<br>(58-76)     | 68<br>(-59-110)   | 1.32<br>(1.31-1.34) | 0.382<br>(0.3774-0.3866)  |
| VAD   | A77       | 10,911 | 45   | 63<br>(52-95)     | 56<br>(48-80)     | 0.59<br>(0.57-0.61) | 0.7452<br>(0.7378-0.7525) |
| VAD   | A78       | 10,911 | 80   | 86<br>(82-98)     | 83<br>(81-94)     | 1.17<br>(1.15-1.19) | 0.5668<br>(0.5584-0.5752) |
| VAD   | A8        | 10,911 | 27   | 32<br>(28-48)     | 30<br>(28-45)     | 0.12<br>(0.11-0.13) | 0.9694<br>(0.9657-0.9731) |
| VAD   | A80       | 10,911 | 42   | 51<br>(45-75)     | 54<br>(45-96)     | 1.64<br>(1.62-1.66) | 0.3557<br>(0.3473-0.3641) |
| VAD   | A85       | 10,911 | 28   | 59<br>(-37-135)   | 63<br>(-38-154)   | 0.77<br>(0.76-0.79) | 0.6563<br>(0.649-0.6635)  |
| VAD   | A93       | 10,911 | 32   | 50<br>(40-75)     | 43<br>(35-80)     | 0.69<br>(0.67-0.71) | 0.6332<br>(0.6239-0.6425) |
| VAD   | A99       | 10,911 | 49   | 60<br>(53-82)     | 58<br>(51-85)     | 2.15<br>(2.13-2.16) | 0.1602<br>(0.1573-0.163)  |
| VAN   | B100      | 10,911 | 32   | 93<br>(-66-144)   | 50<br>(-36-107)   | 1.51<br>(1.49-1.52) | 0.3088<br>(0.303-0.3146)  |
| VAN   | B102      | 10,911 | 63   | 93<br>(-78-121)   | 85<br>(-70-131)   | 0.86<br>(0.83-0.88) | 0.701<br>(0.6917-0.7102)  |

| Group | Sample ID | Reads  | 0.97 |                   |                   |                     |                           |
|-------|-----------|--------|------|-------------------|-------------------|---------------------|---------------------------|
|       |           |        | OTU  | Ace               | Chao              | Shannon             | Simpson                   |
| VAN   | B119      | 10,911 | 40   | 70 –155           | 48<br>(42–71)     | 1.56<br>(1.54–1.58) | 0.281<br>(0.2771–0.285)   |
| VAN   | B13       | 10,911 | 28   | 52<br>(38–83)     | 34<br>(29–55)     | 1.58<br>(1.57–1.59) | 0.2466<br>(0.244–0.2491)  |
| VAN   | B131      | 10,911 | 67   | 75<br>(70–92)     | 73<br>(68–89)     | 1.48<br>(1.46–1.5)  | 0.4407<br>(0.4335–0.4479) |
| VAN   | B16       | 10,911 | 58   | 78<br>(–66–109)   | 73<br>(–63–105)   | 0.75<br>(0.73–0.76) | 0.6564<br>(0.6496–0.6633) |
| VAN   | B17       | 10,911 | 39   | 51<br>(43–77)     | 47<br>(41–70)     | 1.46<br>(1.45–1.47) | 0.296<br>(0.2933–0.2988)  |
| VAN   | B20       | 10,911 | 47   | 96<br>(–73–140)   | 64<br>(–52–100)   | 1.5<br>(1.49–1.52)  | 0.3042<br>(0.3001–0.3082) |
| VAN   | B22       | 10,911 | 46   | 71<br>(58–99)     | 57<br>(49–88)     | 1.32<br>(1.31–1.34) | 0.3517<br>(0.3482–0.3552) |
| VAN   | B23       | 10,911 | 33   | 66<br>(–48–105)   | 49<br>(37–91)     | 1.16<br>(1.14–1.18) | 0.3982<br>(0.3933–0.4032) |
| VAN   | B24       | 10,911 | 65   | 94<br>(–80–123)   | 82<br>(–70–119)   | 2.01<br>(1.99–2.02) | 0.197<br>(0.1935–0.2006)  |
| VAN   | B27       | 10,911 | 49   | 109<br>(–83–155)  | 87<br>(–61–167)   | 0.71<br>(0.7–0.73)  | 0.706<br>(0.6984–0.7135)  |
| VAN   | B28       | 10,911 | 33   | 53<br>(42–80)     | 40<br>(34–67)     | 1.71<br>(1.7–1.73)  | 0.2492<br>(0.2453–0.2532) |
| VAN   | B30       | 10,911 | 29   | 45<br>(35–67)     | 41<br>(32–83)     | 1.15<br>(1.13–1.17) | 0.4569<br>(0.4484–0.4654) |
| VAN   | B35       | 10,911 | 88   | 108<br>(–96–136)  | 109<br>(–95–150)  | 1.46<br>(1.44–1.47) | 0.4284<br>(0.4222–0.4346) |
| VAN   | B37       | 10,911 | 26   | 67<br>(–47–108)   | 35<br>(28–64)     | 1.03<br>(1.02–1.04) | 0.4067<br>(0.4029–0.4105) |
| VAN   | B39       | 10,911 | 33   | 88<br>(–61–139)   | 59<br>(–40–132)   | 0.96<br>(0.94–0.98) | 0.5215<br>(0.5134–0.5296) |
| VAN   | B40       | 10,911 | 50   | 62<br>(54–87)     | 61<br>(53–92)     | 1.9<br>(1.88–1.91)  | 0.2208<br>(0.218–0.2237)  |
| VAN   | B46       | 10,911 | 42   | 51<br>(45–70)     | 48<br>(43–66)     | 0.45<br>(0.43–0.47) | 0.8484<br>(0.8412–0.8556) |
| VAN   | B51       | 10,911 | 46   | 66<br>(55–91)     | 51<br>(47–68)     | 2.27<br>(2.25–2.3)  | 0.1507<br>(0.1472–0.1542) |
| VAN   | B54       | 10,911 | 30   | 66<br>(–46–110)   | 58<br>(–37–143)   | 0.97<br>(0.95–0.98) | 0.504<br>(0.4974–0.5107)  |
| VAN   | B65       | 10,911 | 37   | 48<br>(40–74)     | 60<br>(–42–134)   | 1.48<br>(1.46–1.49) | 0.309<br>(0.3047–0.3133)  |
| VAN   | B9        | 10,911 | 47   | 96<br>(–74–136)   | 69<br>(–54–115)   | 1.1<br>(1.08–1.11)  | 0.4203<br>(0.4172–0.4234) |
| VAN   | B95       | 10,911 | 33   | 41<br>(35–63)     | 37<br>(34–52)     | 2.06<br>(2.05–2.08) | 0.1803<br>(0.1768–0.1838) |
| VAN   | B98       | 10,911 | 36   | 54<br>(41–93)     | 62<br>(–43–135)   | 1.57<br>(1.56–1.58) | 0.2368<br>(0.235–0.2385)  |
| VAN   | 19        | 10,911 | 34   | 61<br>(46–95)     | 43<br>(36–71)     | 1.32<br>(1.31–1.34) | 0.3671<br>(0.3622–0.3719) |
| VAN   | 21        | 10,911 | 44   | 123<br>(–90–182)  | 76<br>(–54–140)   | 1.19<br>(1.17–1.22) | 0.482<br>(0.4727–0.4913)  |
| VAN   | 29        | 10,911 | 157  | 164<br>(–160–175) | 166<br>(–160–185) | 1.32<br>(1.29–1.34) | 0.5897<br>(0.5821–0.5972) |
| VAN   | 38        | 10,911 | 53   | 98<br>(–78–135)   | 87<br>(–64–161)   | 1.5<br>(1.48–1.51)  | 0.3278<br>(0.324–0.3317)  |
